# Supplementary material for: Ceftriaxone modulates the acute corticosterone effects in local field potentials in the primary somatosensory cortex of anesthetized mice
Source: PubMed Central journal article supplement (PMC6937346; doi:10.1038/s41598-019-56827-8), 2019-12-30
Supplement: 41598_2019_56827_MOESM1_ESM.pdf [file 41598_2019_56827_MOESM1_ESM.pdf]

## Ceftriaxone modulates the acute corticosterone effects in local field potentials in the primary somatosensory cortex of anesthetized mice

Miguel Pais-Vieira, Carolina Kunicki, André Peres, Nuno Sousa

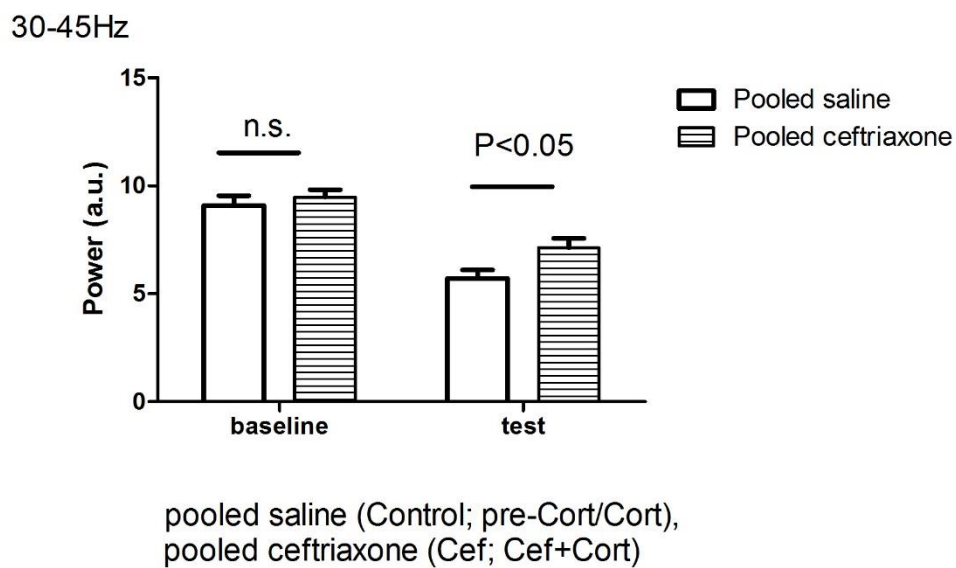

**Supplementary Figure S1: Comparison of Ceftriaxone and Saline effects in pooled groups.** Comparison of groups injected with saline (Control and pre-Cort/Cort) or injected with ceftriaxone (Cef and Cef+Cort) suggests that ceftriaxone may be increasing power in the gamma frequency band. Error bars indicate Mean±SEM, n.s. indicates non-significant.

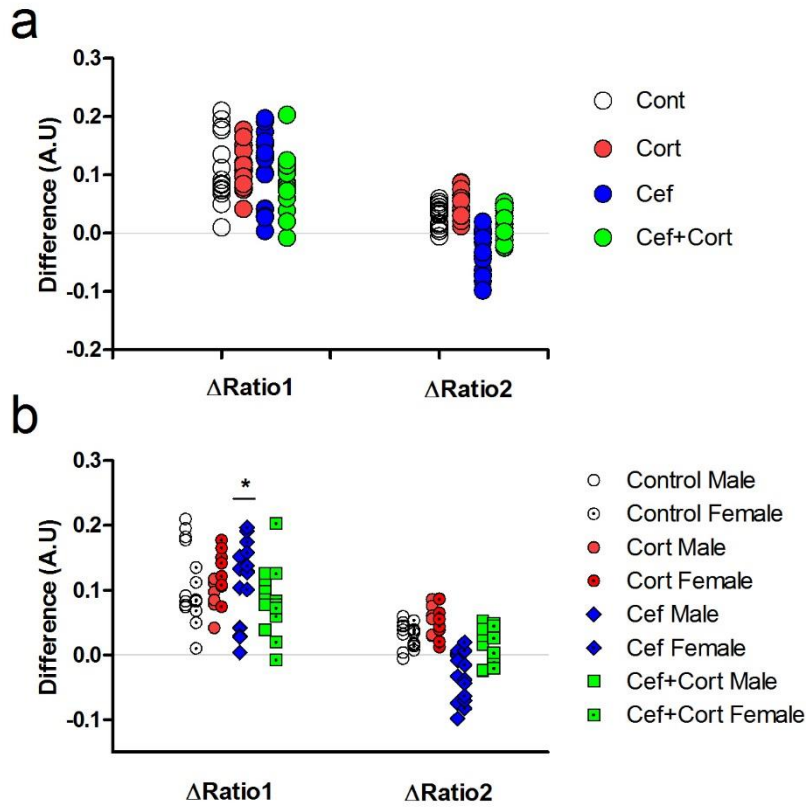

**Supplementary Figure S2: Comparison of state map displacements according to gender.** a)  $\Delta$ Ratio 1 and  $\Delta$ Ratio 2 displacements. b) Gender comparison of  $\Delta$ Ratio displacements. A significant effect was found when male and female samples were compared, suggesting that ceftriaxone may have opposite effects in  $\Delta$ Ratio1. No significant differences were found in  $\Delta$ Ratio 2. \* P < 0.05 for *post hoc* comparison.
